# Supplementary material for: GIRK1 triggers multiple cancer-related pathways in the benign mammary epithelial cell line MCF10A
Source: PubMed Central journal article supplement (PMC6917815; doi:10.1038/s41598-019-55683-w), 2019-12-17
Supplement: 41598_2019_55683_MOESM1_ESM.pdf [file 41598_2019_55683_MOESM1_ESM.pdf]

## Supplementary Figures & Tables

### **GIRK1 triggers multiple cancer-related pathways in the benign mammary epithelial cell line MCF10A**

SCHRATTER G.<sup>1,\*</sup>, SCHERUEBEL S.<sup>1,\*</sup>, LANGTHALER S.<sup>2</sup>, ESTER K.<sup>3</sup>, PELZMANN B.<sup>1,\*</sup>, GHAFARI TABRIZI-WIZSY N.<sup>4</sup>, REZANIA S.<sup>1,\*</sup>, GORISCHEK A.<sup>1,\*</sup>, PLATZER D.<sup>1,\*</sup>, ZORN-PAULY K.<sup>1,\*</sup>, AHAMMER H.<sup>1</sup>, PROKESCH A.<sup>5</sup>, STANZER S.<sup>6</sup>, DeVANEY T.T.J.<sup>1,\*</sup>, SCHMIDT K.<sup>7</sup>, JAHN S.W.<sup>8</sup>, PRASSL R.<sup>1,\*</sup>, BAUERNHOFER T.<sup>6,\*</sup>, SCHREIBMAYER W.<sup>1,\*,+</sup>.

<sup>1</sup>: Gottfried Schatz Research Center for Cell Signaling, Metabolism and Aging, Medical University of Graz, Austria.

<sup>2</sup>: Institute for Health Care Engineering with European Testing Center of Medical Devices, Technical University of Graz, Austria

<sup>3</sup>: Laboratory of Experimental Therapy, Division of Molecular Medicine, Ruđer Bošković Institute, Bijenička 54, 10000 Zagreb, Croatia

<sup>4</sup>: Institute of Immunology and Pathophysiology, SFL Chicken CAM Laboratory, Medical University of Graz, Austria

<sup>5</sup>: Cell Biology, Histology and Embryology, Medical University of Graz, Austria

<sup>6</sup>: Division of Oncology, Department of Internal Medicine, Medical University of Graz, Austria

<sup>7</sup>: Institute of Pharmaceutical Sciences, Karl Franzens University of Graz, Austria

<sup>8</sup>: Diagnostic & Research Institute of Pathology, Medical University of Graz, Austria

\*: Research Unit on Ion Channels and Cancer Biology, Medical University of Graz, Austria

+: corresponding author: Gottfried Schatz Research Center for Cell Signaling, Metabolism and Aging, Research Unit "Ion Channels and Cancer Biology", Medical University of Graz, Austria, Phone: +43 316 388 71533, Fax: +43 316 385 79611.

**Supplementary Figure S1: *GIRK1* mRNA levels of chimeric *MCF7<sup>GIRK1/eYFP</sup>* compared to bicistronic *MCF7<sup>GIRK1</sup>* cell lines**

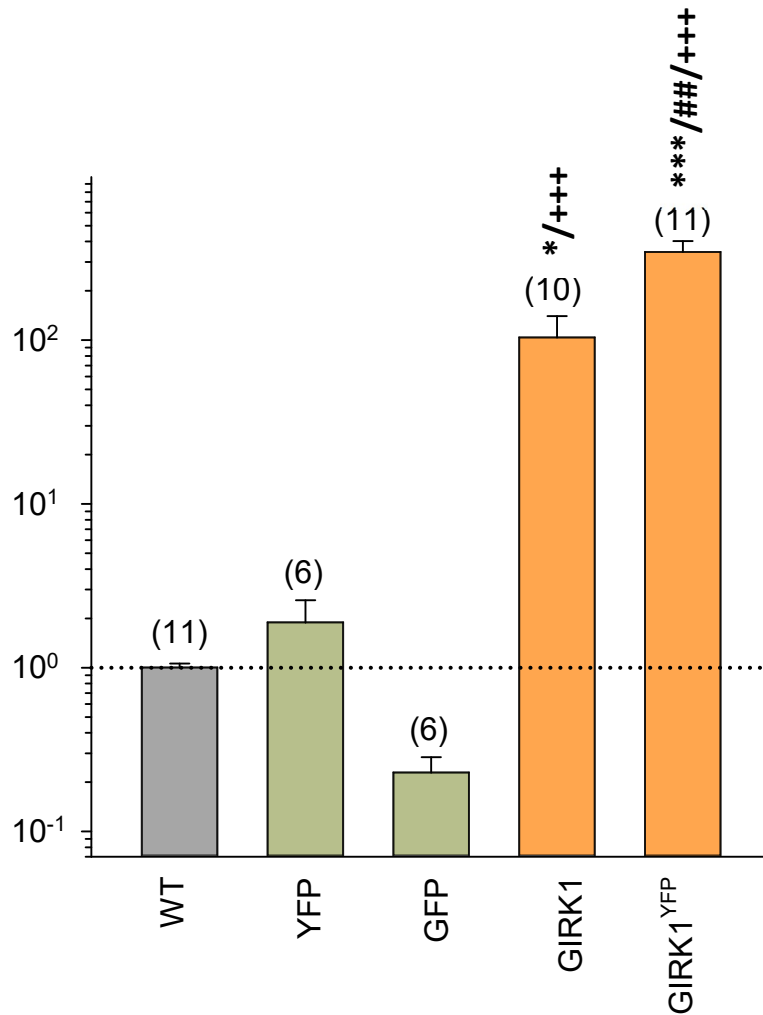

GIRK1 mRNA levels are normalized to MCF7<sup>WT</sup>. *WT*: MCF7<sup>WT</sup>, *eYFP*: MCF7<sup>eYFP</sup>, *eGFP*: MCF7<sup>eGFP</sup>, *GIRK1*: MCF7<sup>GIRK1</sup> and *GIRK1<sup>eYFP</sup>*: MCF7<sup>GIRK1/eYFP</sup>. MCF7<sup>eGFP</sup> and MCF7<sup>GIRK1</sup> represent the cell lines engineered using the bicistronic pIRES2eGFP vector described here, while MCF7<sup>eYFP</sup> and MCF7<sup>GIRK1/eYFP</sup> represent the chimeric GIRK1/eYFP protein. Number of experiments is given in parenthesis above each bar. \*, (\*\*\*) : the group differs statistically significant from MCF7<sup>WT</sup> p<0.05 (<0.001) level. ##: the group differs statistically significant from MCF7<sup>eYFP</sup> at the p<0.05 level. +++: the group differs statistically significant from MCF7<sup>eGFP</sup> at the p<0.001 level.

**Supplementary Figure S2: Colony formation and growth assay performed on the different MEC lines**

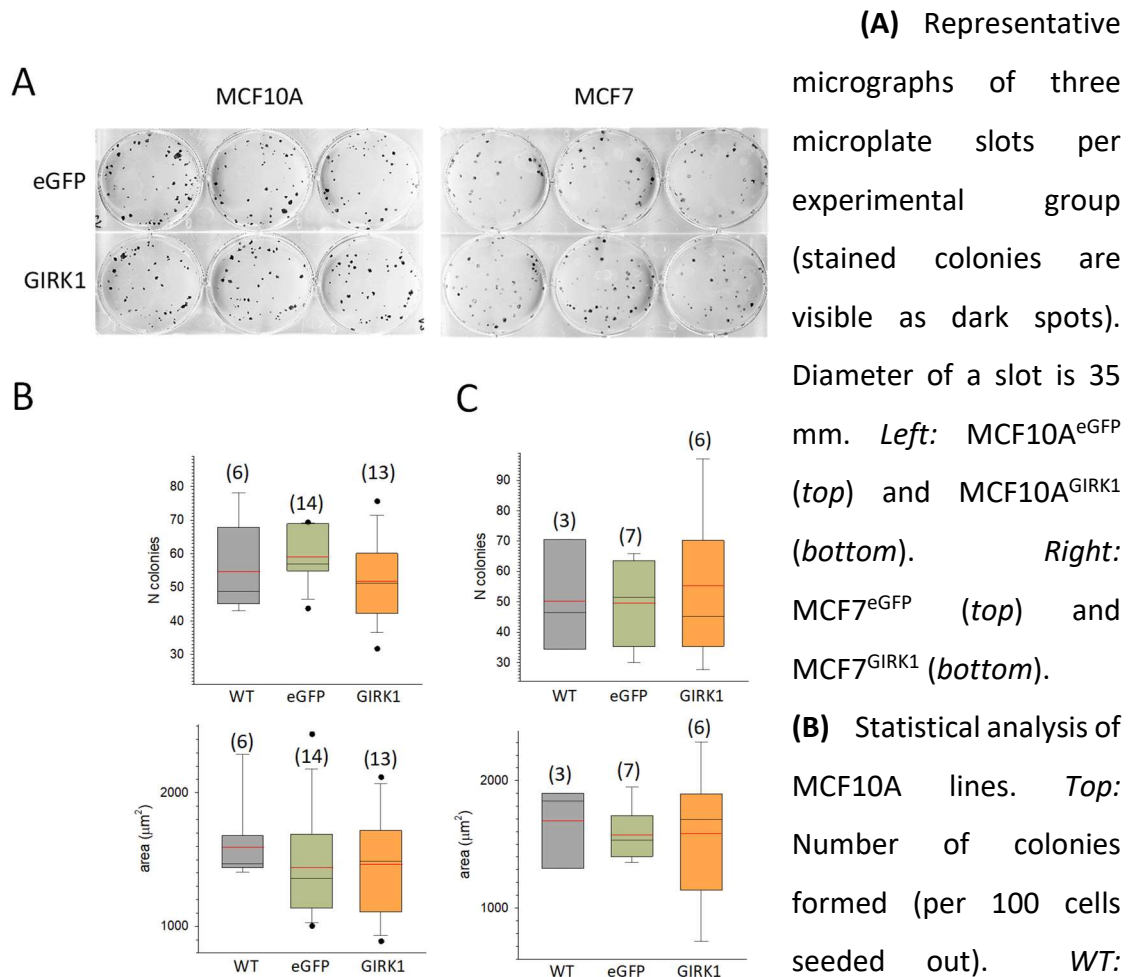

MCF10A<sup>WT</sup>, *eGFP:* MCF10A<sup>eYFP</sup> and *GIRK1:* MCF10A<sup>GIRK1</sup>. *Bottom:* areas of colonies at time of harvesting. *WT:* MCF10A<sup>WT</sup>, *eGFP:* MCF10A<sup>eYFP</sup> and *GIRK1:* MCF10A<sup>GIRK1</sup>. The median value is represented by the black line within the box, box margins represent 75% and 25% percentiles, whiskers indicate 90% and 10% percentiles. The red line represents the mean value. Individual values outside the 10% and 90% percentiles are shown as black circles. The numbers of replicates performed is given above each box in parenthesis. The differences between the experimental groups, neither for the number of colonies formed, nor for colony area, are not statistically significant different.

**(C)** Similar to (B), but results of MCF7 lines are shown. The differences between the experimental groups, neither for the number of colonies formed, nor for colony area, are not statistically significant different.

Supplementary Figure S3: Heat maps of significantly UP-regulated gene clusters:

Cluster #1\_UP

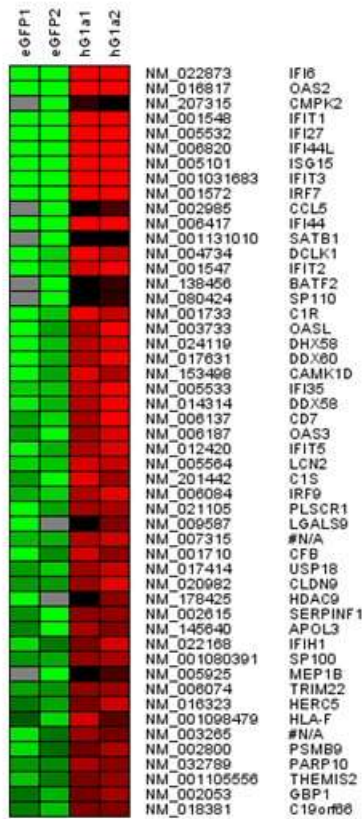

Cluster #2\_UP

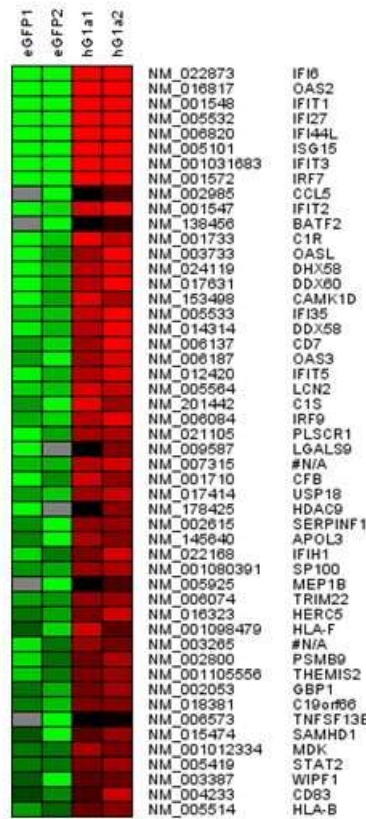

Cluster #3\_UP

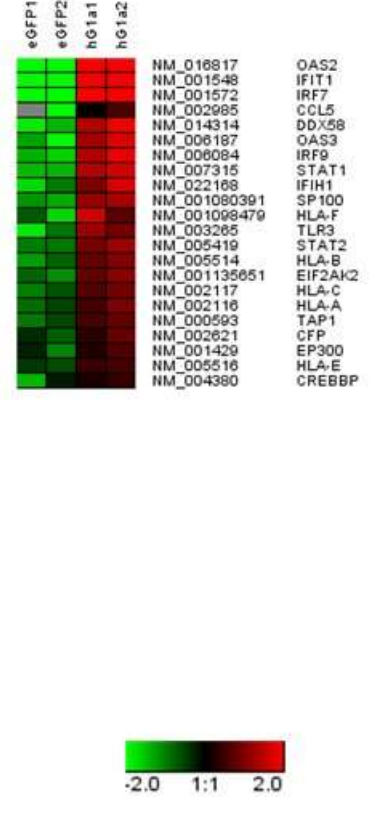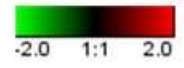

Supplementary Figure S4A: Heat maps of significantly DOWN-regulated gene clusters:

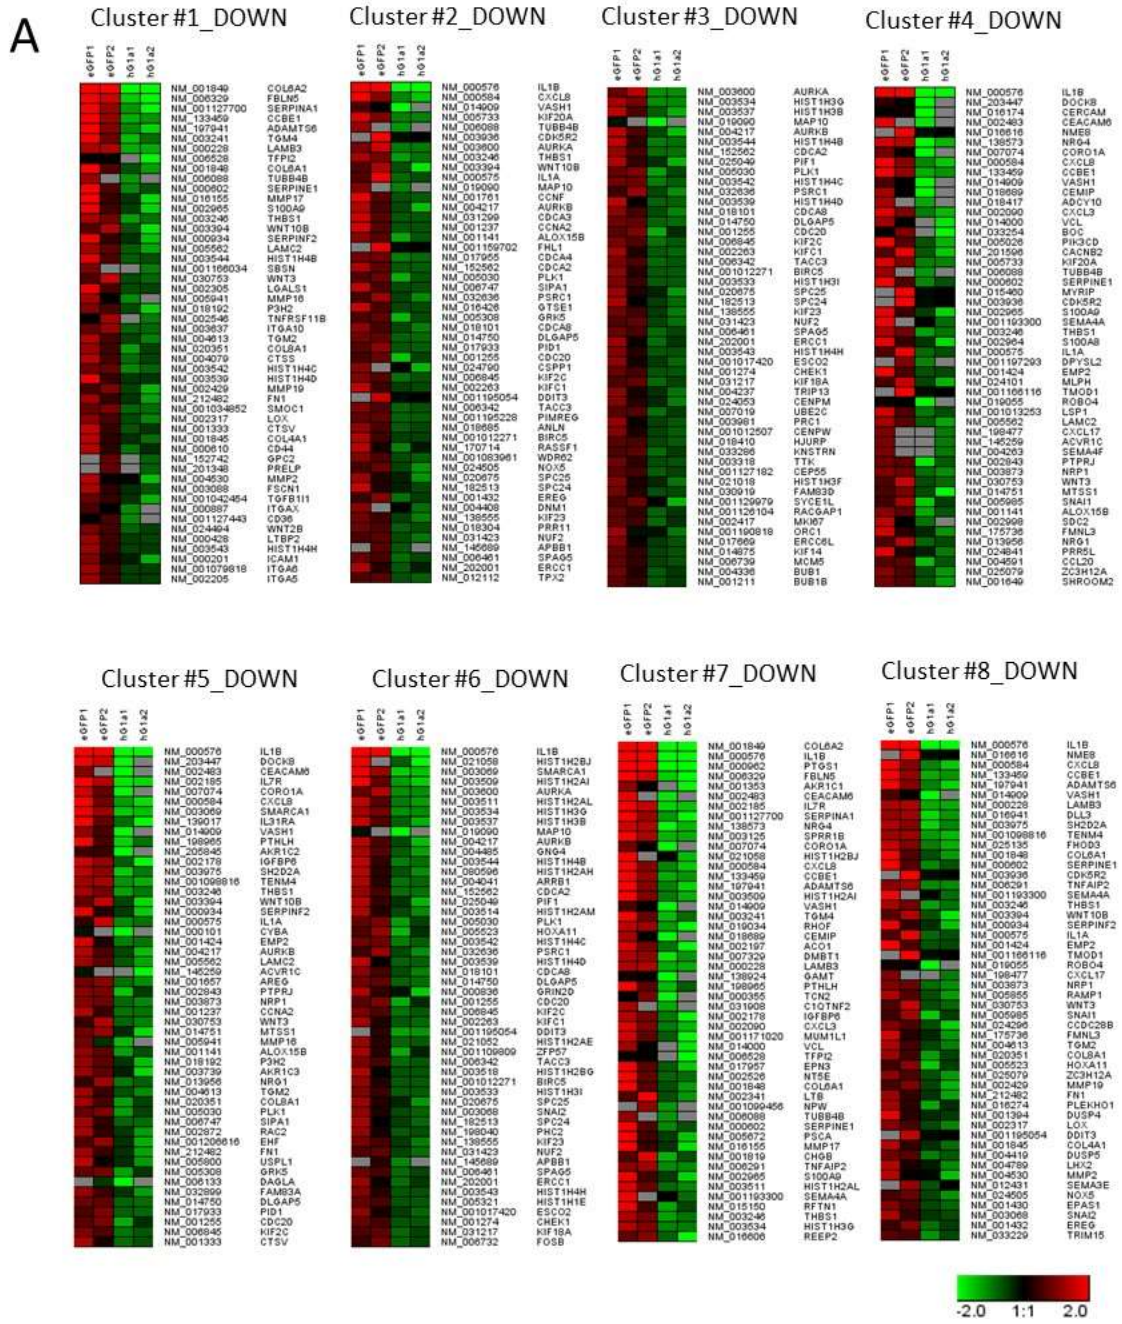



Supplementary Figure S4B: Heat maps of significantly DOWN-regulated gene clusters:

B

Cluster#10\_DOWN

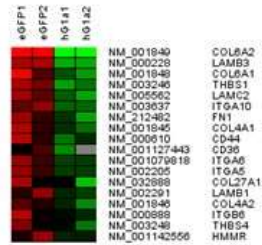

Cluster#11\_DOWN

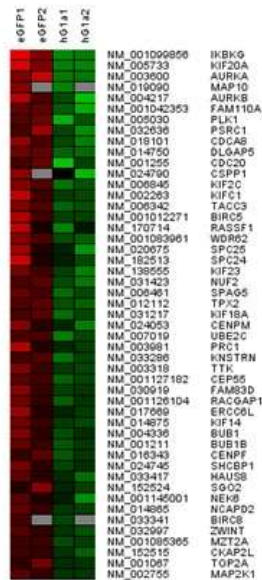

Cluster#12\_DOWN

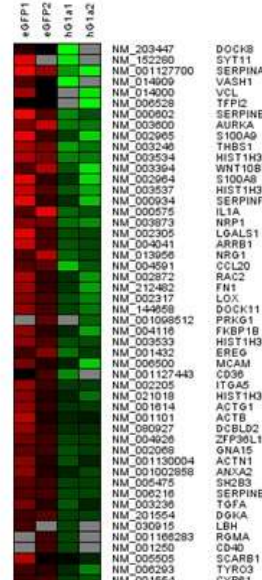

Cluster#18\_DOWN

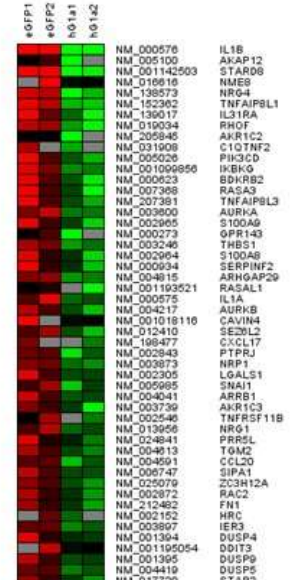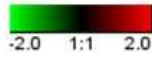

**Supplementary Figure S5: Validation of RNA-seq by qPCR:**

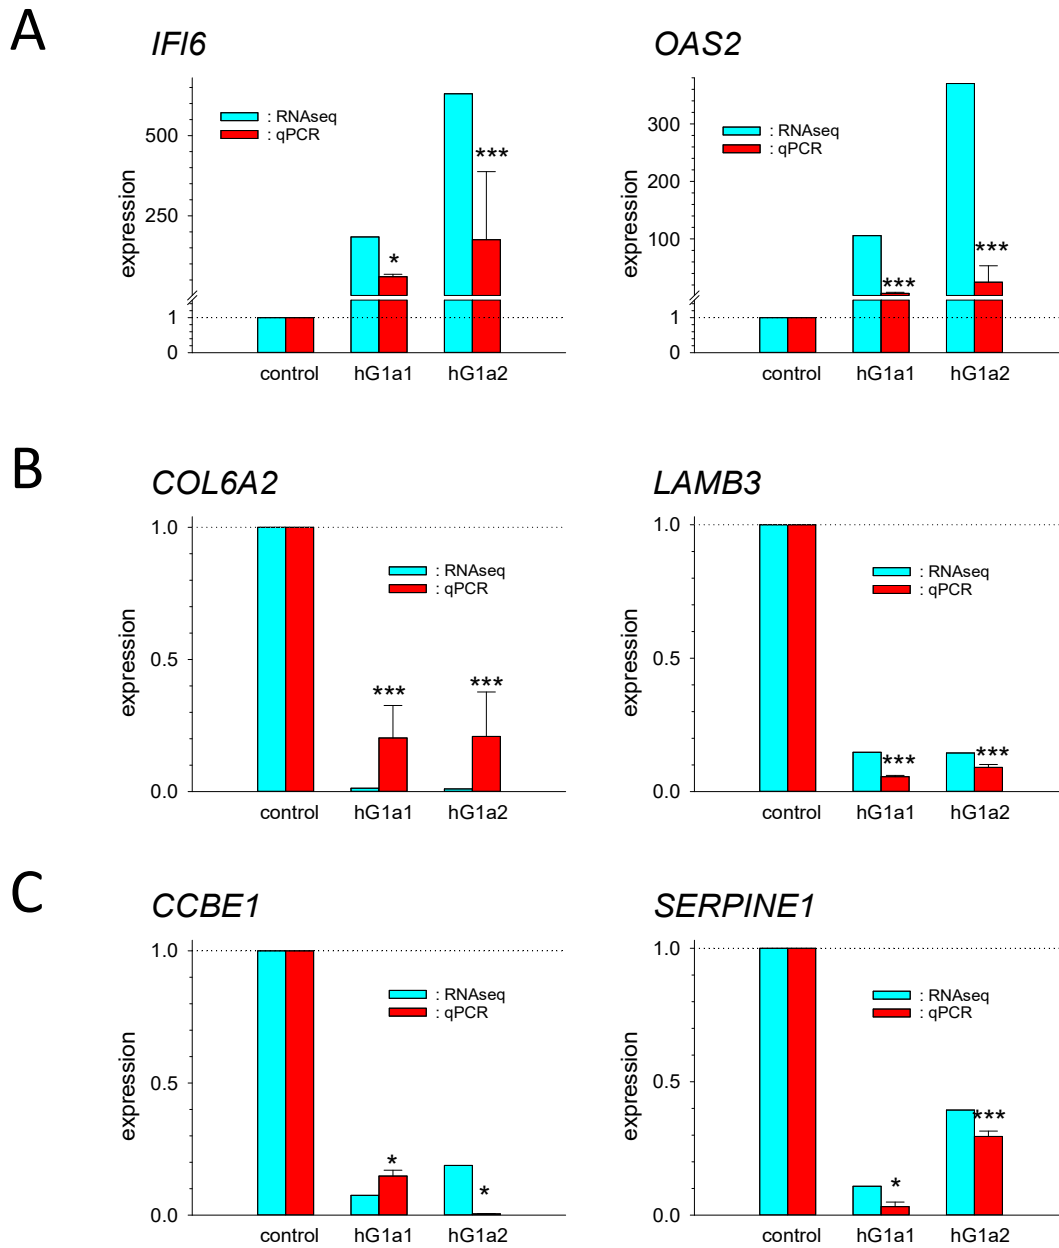

RNA-seq expression of six genes, selected from the three most important clusters was confirmed by independent qPCR (YWHAZ was used as reference for qPCR; see supplementary Table S2 for primer sequences). Expression level of the gene of interest in the libraries derived from GIRK1 overexpressors was normalized to one of the control libraries and are shown as fold change on the y-axis (eGFP1 was used as control for hG1a1 and eGFP2 as control for hG1a2, respectively). A high correlation between RNA-seq and qPCR expression levels could be detected. All genes were differentially expressed in comparison to the reference (\*, (\*\*\*) : p-value is statistically significantly different at the <0.05, (0.001) level). **(A)**: Gene cluster IF $\gamma$ , **(B)**: Gene cluster ECM and **(C)**: gene cluster migration.

**Supplementary Table S1: Key resource table of reagents**

| <b>Key resource table of reagents</b>              |                            |                    |                               |
|----------------------------------------------------|----------------------------|--------------------|-------------------------------|
| <b>Product designation</b>                         | <b>Source or reference</b> | <b>Identifiers</b> | <b>Additional information</b> |
| L-Glutamine solution                               | Merck                      | G7513 100ML        | 200 mM                        |
| 4x Laemmli buffer                                  | BioRad                     | 1610747            |                               |
| 7-AAD Viability Staining Solution                  | BD Biosciences             | 00-6993-50         |                               |
| Acetic acid                                        | Merck                      | 1000632500         | 100%                          |
| Asel                                               | NEB                        | R0526S             |                               |
| BamHI                                              | Promega                    | R6021              |                               |
| BSA                                                | Roth                       | 3854.2             |                               |
| Cell counting slides                               | Biozym                     | 872010             |                               |
| CHEMICON ECM Cell Adhesion Array Kit               | MERCK                      | ECM540             |                               |
| Cholera Toxin                                      | Merck                      | C8052-.5MG         |                               |
| Clean-Blot IP detection reagent                    | ThermoFisher               | 21230              |                               |
| Click-iT EdU Pacific Blue Flow Cytometry Assay Kit | ThermoFisher               | C10418             |                               |
| complete Mini Protease inhibitor Cocktail          | Merck                      | 11836170001        |                               |
| Costar 6-well Multiple Well Plates                 | Corning Inc.               | 3506               |                               |
| crystal violet                                     | Merck                      | C0775              | 0,10%                         |
| Difco TM Skim Milk                                 | BD Biosciences             | 232100             |                               |
| ECL Select Western Blotting Detection Reagent      | MERCK                      | GERPN2235          |                               |



| <b>Product designation</b>                           | <b>Source or reference</b> | <b>Identifiers</b> | <b>Additional information</b>                                                                                          |
|------------------------------------------------------|----------------------------|--------------------|------------------------------------------------------------------------------------------------------------------------|
| EdU                                                  | ThermoFisher               | C10418             |                                                                                                                        |
| FBS (Fetal Bovine Serum)                             | Merck                      | F7524-500ML        | Lot No 025M3355                                                                                                        |
| Frackelton buffer                                    | -                          | -                  | 10 mM Tris, 50 mM NaCl, 30 mM Na <sub>4</sub> P <sub>2</sub> O <sub>7</sub> , 50 mM NaF, 200 mg/L Triton X-100, pH 7,1 |
| G418 disulfate salt                                  | Merck                      | A1720-1G           |                                                                                                                        |
| GIRK1 N-T                                            | Kurt Schmidt               | N/A                | MK4                                                                                                                    |
| GIRK1                                                | Abcam                      | 119246             | RRID:AB_10903846                                                                                                       |
| GIRK1 C-T                                            | Alomone Labs               | APC-005            | RRID:AB_2040113                                                                                                        |
| Hard Shell 480 PCR 96 Multiwell plates               | BioRad                     | 4 729 692 001      |                                                                                                                        |
| Immobilon-P PVDF Membrane                            | Merck                      | IPVH07850          |                                                                                                                        |
| Ion AmpliSeq Transcriptome Human Gene Expression Kit | ThermoFisher               | A26325             |                                                                                                                        |
| Ion PI Chip Kit                                      | ThermoFisher               | A26771             |                                                                                                                        |
| Kanamycin                                            | MERCK                      | K0254-20ML         |                                                                                                                        |
| Laemmli Sample Buffer                                | BioRad                     | 1610747            |                                                                                                                        |
| Lipofectamine 2000                                   | ThermoFisher               | 11668027           |                                                                                                                        |
| Matrigel                                             | BD Biosciences             | 356237             |                                                                                                                        |
| MCF10A                                               | ATCC                       | ATCC® CRL-10317™   |                                                                                                                        |
| MCF7                                                 | ATCC                       | ATCC® HTB-22™      |                                                                                                                        |
| MEBM (Mammary Epithelial Cell Growth Basal Medium)   | Lonza                      | CC-3151            |                                                                                                                        |

| <b>Product designation</b>                    | <b>Source or reference</b> | <b>Identifiers</b> | <b>Additional information</b> |
|-----------------------------------------------|----------------------------|--------------------|-------------------------------|
| MEM (Minimum Essential Medium Eagle)          | Merck                      | M2279-500ML        |                               |
| Methanol                                      | Roth                       | 082.1              | 100%                          |
| NheI                                          | Promega                    | R6501              |                               |
| PBS, pH 7.4                                   | ThermoFisher               | 10010-015          |                               |
| Penicillin-Streptomycin                       | MERCK                      | P0781-100ML        |                               |
| Peroxidase Goat Anti-Rabbit                   | Jackson Immuno Research    | 111-035-144        | RRID:AB_2307391               |
| Pierce™ Protein A Agarose                     | ThermoFisher               | 20333              |                               |
| Pipette tip 200µl yellow                      | SARSTEDT                   | 70.760.012         |                               |
| pIRES2eGFP                                    | Clontech                   | 6029-1             |                               |
| Ponceau S                                     | Merck                      | P7170              |                               |
| Protein A Agarose                             | ThermoFisher               | 20333              |                               |
| QIA shredder spin column                      | QIAGEN                     | 79645              |                               |
| qPCR QuantiFast SYBR Green PCR Kit            | QIAGEN                     | 204054             |                               |
| QuantiTect Rev. Transcription Kit             | QIAGEN                     | 205311             |                               |
| RNeasy Mini Kit                               | QIAGEN                     | 74104              |                               |
| SingleQuots Supplements                       | Lonza                      | CC-4136            |                               |
| Sodium Pyruvate                               | ThermoFisher               | 11360039           | 100 mM                        |
| Spectra Multicolor Broad Range Protein Ladder | ThermoFisher               | 26634              |                               |

| <b>Product designation</b>          | <b>Source or reference</b> | <b>Identifiers</b> | <b>Additional information</b>   |
|-------------------------------------|----------------------------|--------------------|---------------------------------|
| SuperScript VILO cDNA Synthesis Kit | ThermoFisher               | 11754050           |                                 |
| SYBR Green PCR Kit                  | QIAGEN                     | 204054             |                                 |
| T75 Flask                           | Sarstedt                   | 83.3911.002        |                                 |
| TBST                                | -                          | -                  | 200 mM/L TRIS<br>1400 mM/L NaCl |
| TC Dishes 35                        | Sarstedt                   | 83.3900            |                                 |
| Tissue Culture Plate, 24 well       | FALCON                     | 353847             |                                 |
| Transfer Buffer                     | ThermoFisher               | BT0006             |                                 |

**Supplementary Table S2: primers used for PCR**

| <b>Primer designation</b> | <b>Sequence</b>                           |
|---------------------------|-------------------------------------------|
| YWHAZ-f:                  | 5' -ACTTTTGGTACATGTGGCTTCAA-3'            |
| YWHAZ-r:                  | 5' -CCGCCAGGACAAACCAGTAT-3'               |
| GAPDH-f:                  | 5'-ATGGGGAAGGTGAAGGTCG-3'                 |
| GAPDH-r:                  | 5'-GGGGTCATTGATGGCAACAATA-3'              |
| qPCR-GIRK1a-f:            | 5'-GTGGAACAACACTGGGATGAC-3'               |
| qPCR-GIRK1a-r:            | 5'-GTTGCATGGAACCTGGGAGTA-3'               |
| plasmid-GIRK1a-f:         | 5' -TTAGCTAGCATGTCTGCACTCCGAAGGAAATTTG-3' |
| plasmid-GIRK1a-r:         | 5' -TTAGGATCCTTATGTGAAGCGATCAGAGTT C-3'   |
| qPCR-LAMB3B-f             | 5' -CTTTGACCCCGCTGTGTTTG-3'               |
| qPCR-LAMB3B-r:            | 5' -CTGACACCGCTCACAGTTCT-3'               |
| qPCR-COL6A2-f:            | 5' -GCAGAGCTGTCCTTCGTGT-3'                |
| qPCR-COL6A2-r:            | 5' -TGGGTACCACGTTCTCGTT-3'                |
| qPCR-IL1B-f:              | 5' -TGAGCTCGCCAGTCAAATGA-3'               |
| qPCR-IL1B-r:              | 5' -AGATTCGTAGCTGGATGCCG-3'               |
| qPCR-SERPINE1-f:          | 5' -GCCAGTGGAAAGACTCCCTTC-3'              |
| qPCR-SERPINE1-r:          | 5' -GTGCTGCCGTCTGATTTGTG-3'               |
| qPCR-CCBE1-f:             | 5' -GGACACACGTGGACCTACAG-3'               |
| qPCR-CCBE1-r:             | 5' -GTCGTCGCGATTTTGCTCTC-3'               |
| qPCR-IFI6-f:              | 5' -GGTGAGAATGCGGGTAAGGAT-3'              |
| qPCR-IFI6-r:              | 5' -AGGTCAGGGCCTTCCAGAAC-3'               |
| qPCR-OAS2-f:              | 5' -CGTTGGTGTGGCATCTTCTG-3'               |
| qPCR-OAS2-r:              | 5' -TGCATTGTCGGCACTTTCCA-3'               |

**Supplementary Table S3: List of significantly regulated clusters as detected by DAVID**

| <b>UP-regulated</b>   | <b>Cluster No.</b> | <b>Enrichment Score (ES)</b> | <b>p=(10<sup>-65</sup>)</b> | <b>Benjamini-Hochberg</b> | <b>FDR</b>  | <b>Prototyp. Name</b>                                      | <b>also</b>                                                         |
|-----------------------|--------------------|------------------------------|-----------------------------|---------------------------|-------------|------------------------------------------------------------|---------------------------------------------------------------------|
|                       | 1                  | 7.611970358                  | 2.4436E-08                  | 2.65E-16                  | 9.24E-17    | GO:0034340~response to type I interferon                   | GO:0071345~cellular response to cytokine stimulus                   |
|                       | 2                  | 3.678708775                  | 2.0955E-04                  | 2.63E-09                  | 4.58E-09    | GO:0045087~innate immune response                          | GO:0001817~regulation of cytokine production                        |
|                       | 3                  | 3.128065629                  | 7.4462E-04                  | 2.83E-04                  | 1.56E-03    | hsa05168:Herpes simplex infection                          | hsa05160:Hepatitis C                                                |
| <b>DOWN-regulated</b> |                    |                              |                             |                           |             |                                                            |                                                                     |
|                       | 1                  | 5.994629397                  | 1.0124E-06                  | 1.25E-06                  | 1.09E-05    | GO:0031012~extracellular matrix                            | also                                                                |
|                       | 2                  | 5.18649804                   | 3.0294E-06                  | 1.19E-06                  | 3.60E-07    | GO:0000280~nuclear division                                | hsa04512:ECM-receptor interaction                                   |
|                       | 3                  | 5.504568335                  | 3.1292E-06                  | 2.00E-05                  | 3.03E-05    | GO:0000819~sister chromatid segregation                    | GO:0007059~chromosome segregation                                   |
|                       | 4                  | 5.428137424                  | 3.7313E-06                  | 1.21E-05                  | 1.47E-05    | GO:0030335~positive regulation of cell migration           | GO:0006935~chemotaxis                                               |
|                       | 5                  | 4.478903449                  | 3.3197E-05                  | 5.09E-05                  | 2.47E-04    | GO:0008283~cell proliferation                              | GO:0008284~positive regulation of cell proliferation                |
|                       | 6                  | 4.43323983                   | 3.6031E-05                  | 8.18E-10                  | 1.80E-09    | GO:0044815~DNA packaging complex                           | GO:0000786~nucleosome                                               |
|                       | 7                  | 4.274924673                  | 5.3098E-05                  | 2.18E-05                  | 3.35E-04    | GO:0044421~extracellular region part                       | GO:0005576~extracellular region                                     |
|                       | 8                  | 4.225635365                  | 5.9479E-05                  | 2.69E-05                  | 5.71E-05    | GO:0001568~blood vessel development                        | GO:0001944~vasculature development                                  |
|                       | 9                  | 3.400777675                  | 3.9739E-04                  | 0.002764337               | 0.034363623 | GO:0001704~formation of primary germ layer                 | GO:0001706~endoderm formation                                       |
|                       | 10                 | 3.356937953                  | 4.3960E-04                  | 4.63E-04                  | 6.87E-03    | hsa04512:ECM-receptor interaction                          | hsa04510:Focal adhesion                                             |
|                       | 11                 | 3.26593354                   | 5.4208E-04                  | 2.00E-05                  | 3.03E-05    | GO:0000819~sister chromatid segregation                    | GO:0000070~mitotic sister chromatid segregation                     |
|                       | 12                 | 3.138542676                  | 7.2687E-04                  | 0.006853849               | 0.108241341 | GO:0009611~response to wounding                            | GO:0042060~wound healing                                            |
|                       | 13                 | 3.061209779                  | 8.6854E-04                  | 0.002677864               | 0.032475661 | GO:0007088~regulation of mitotic nuclear division          | GO:0051783~positive regulation of nuclear division                  |
|                       | 14                 | 2.702736206                  | 1.9827E-03                  | 0.061642788               | 2.304387456 | GO:00030574~collagen catabolic process                     | GO:0044259~multicellular organismal macromolecule metabolic process |
|                       | 15                 | 2.390350153                  | 4.0705E-03                  | 0.043967133               | 1.379243118 | GO:0051781~positive regulation of cell division            | GO:0045787~positive regulation of cell cycle                        |
|                       | 16                 | 2.371547907                  | 4.2506E-03                  | 0.008902757               | 0.159649619 | GO:0002687~positive regulation of leukocyte migration      | GO:0097530~granulocyte migration                                    |
|                       | 17                 | 2.327843649                  | 4.7006E-03                  | 0.015561026               | 0.327171071 | GO:0060707~trophoblast giant cell differentiation          | GO:0009790~embryo development                                       |
|                       | 18                 | 2.316570367                  | 4.8242E-03                  | 0.006848572               | 0.110236555 | GO:1902531~regulation of intracellular signal transduction | GO:0005085~guanyl-nucleotide exchange factor activity               |
|                       | 19                 | 2.231532319                  | 5.8677E-03                  | 0.02470726                | 0.604252092 | GO:0007051~spindle organization                            | GO:0000022~mitotic spindle elongation                               |
|                       | 20                 | 2.218123064                  | 6.0517E-03                  | 0.012299808               | 0.243313002 | GO:0007186~G-protein coupled receptor signaling pathway    | GO:0004872~receptor activity                                        |
|                       | 21                 | 2.156449856                  | 6.9751E-03                  | 0.038651025               | 1.092183278 | GO:0031589~cell-substrate adhesion                         | GO:0010810~regulation of cell-substrate adhesion                    |
|                       | 22                 | 2.128847423                  | 7.4328E-03                  | 0.033701725               | 2.672854827 | GO:0030864~cortical actin cytoskeleton                     | GO:0030863~cortical cytoskeleton                                    |
|                       | 23                 | 2.069397176                  | 8.5232E-03                  | 0.002764337               | 0.034363623 | GO:0001704~formation of primary germ layer                 | GO:0007369~gastrulation                                             |
|                       | 24                 | 2.007981647                  | 9.8179E-03                  | 0.006848572               | 0.110236555 | GO:1902531~regulation of intracellular signal transduction | GO:0023051~regulation of signaling                                  |
|                       | 25                 | 1.905711994                  | 1.2425E-02                  | 0.081254757               | 0.971719772 | GO:0008092~cytoskeletal protein binding                    | GO:0030029~actin filament-based process                             |
|                       | 26                 | 1.854749417                  | 1.3972E-02                  | 0.0478295                 | 1.531717555 | GO:00048608~reproductive structure development             | GO:0061458~reproductive system development                          |
|                       | 27                 | 1.851650373                  | 1.4072E-02                  | 1.39E-04                  | 1.01E-03    | GO:0051290~protein heterotrimerization                     | GO:0034723~DNA replication-dependent nucleosome organization        |
|                       | 28                 | 1.835203732                  | 1.4615E-02                  | 0.015773628               | 0.346064714 | GO:0007346~regulation of mitotic cell cycle                | GO:1902749~regulation of cell G2/M phase transition                 |
|                       | 29                 | 1.794551181                  | 1.6049E-02                  | 0.294675707               | 8.884232497 | GO:0005539~glycosaminoglycan binding                       | GO:00008201~heparin binding                                         |
|                       | 30                 | 1.765752957                  | 1.7149E-02                  | 0.008298175               | 0.141211424 | GO:0007350~blastoderm segmentation                         | GO:0048846~axon extension involved in axon guidance                 |
